# Supplementary material
Source: publisher figshare collection journal article supplement (https://frontiersin.figshare.com/ndownloader/files/20077319)

Supplementary Material

.

# Supplementary Figures

**Supplementary Figure 1**. Pictures of MDC set up at A) IMDEA Water facilities and B) LEITAT facilities.


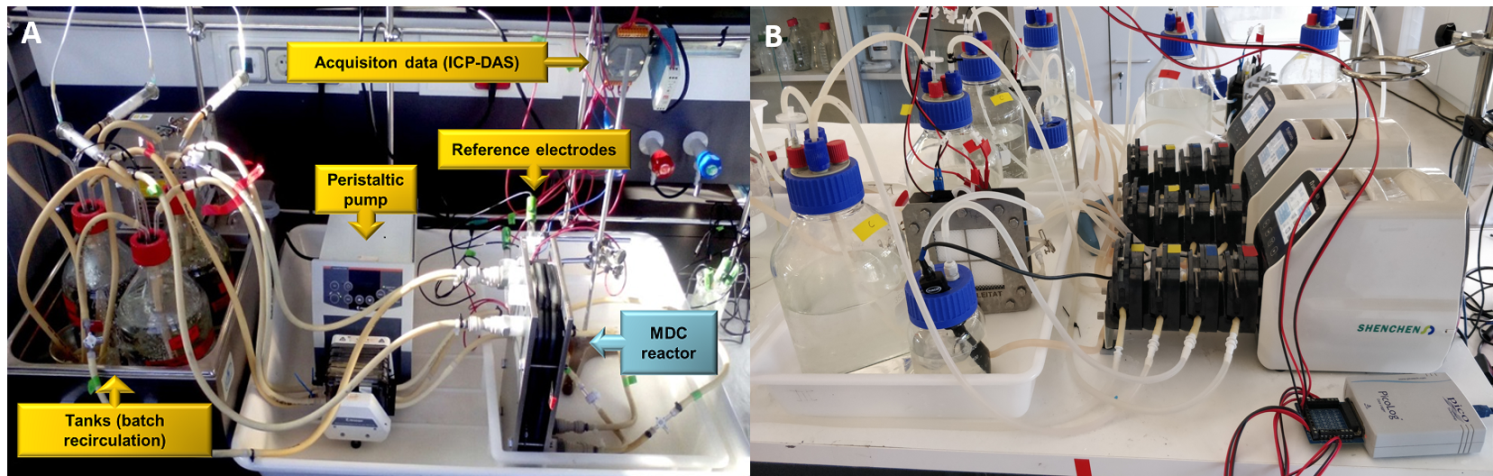

Supplement: Supplementary file 1 [file 20077319]
